# Supplementary material for: Differential Effects of Whole Red Raspberry Polyphenols and Their Gut Metabolite Urolithin A on Neuroinflammation in BV-2 Microglia
Source: PubMed Central journal article supplement (PMC7795536; doi:10.3390/ijerph18010068), 2020-12-24
Supplement: ijerph-18-00068-s001.pdf [file ijerph-18-00068-s001.pdf]

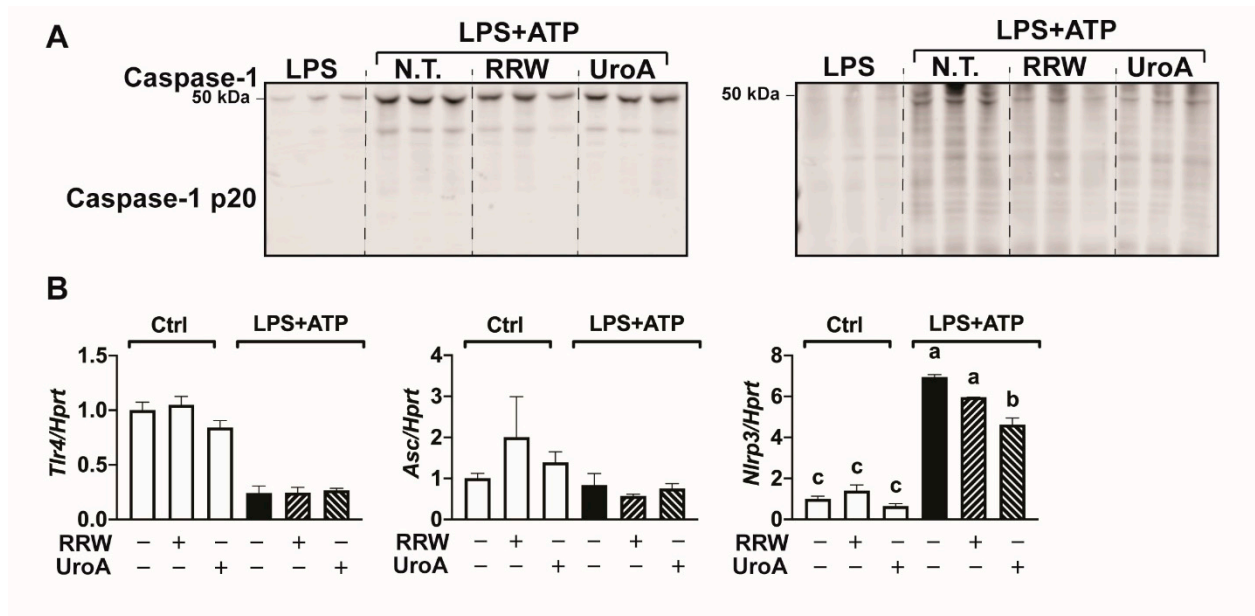

**Table S1.** Phenolic composition of whole red raspberry extracts.

| Phenolic (mg per g Dry Extract)          | Whole Red Raspberry (RRW) |
|------------------------------------------|---------------------------|
| Quercetin                                | 2.73 ± 0.02               |
| Myricetin                                | 19.1 ± 0.02               |
| Ellagic acid                             | 66.1 ± 3.92               |
| (+)-Catechin                             | 11.4 ± 1.44               |
| (-)-Epicatechin                          | 75.4 ± 0.31               |
| Anthocyanin                              |                           |
| Cyanidin 3-O-β-d-glucoside               | 8.73 ± 0.01               |
| Cyanidin 3-O-β-d-glucoside equivalent    | 39.6 ± 0.04               |
| Total phenolic content (mg of GAE per g) | 279.0 ± 31                |

Values represent the mean ± SD of triplicate tests. Ellagitannin is calculated as ellagic acid after hydrolysis. The Cyanidin-3-sophoroside peak is quantified as Cyanidin 3-O-d-glucoside equivalent. GAE, gallic acid equivalent. Adapted from Rong et al., 2020.

**Table S2.** Primer sequences for qPCR.

| Gene | Forward/Reverse | Sequence (5'-3')         |
|------|-----------------|--------------------------|
| Il1b | Forward         | TCCAGGATGAGGACATGAGCAC   |
|      | Reverse         | GAACGTCACACACCAGCA GGTTA |
| Il6  | Forward         | CCCCAATTTCCAATGCTCTCCT   |
|      | Reverse         | CGCACTAGGTTTGCCGAGTA     |

|       |         |                            |
|-------|---------|----------------------------|
| Tnf   | Forward | AACTTCGGGGTGATCGGTCC       |
|       | Reverse | GGTGGTTTGTGAGTGTGAGGG      |
| iNos  | Forward | TTGGTGAAGGGACTGAGCTGT      |
|       | Reverse | CCGTGGAGTGAACAAGACCCA      |
| Ym1   | Forward | AGACTTGCGTGACTATGAAGCATTG  |
|       | Reverse | GCAGGTCCAAACTTCCATCCTC     |
| Nlrp3 | Forward | ATGCTGCTTCGACATCTCCT       |
|       | Reverse | AACCAATGCGAGATCCTGAC       |
| Tlr4  | Forward | AGTGGGTCAAGGAACAGAAGCA     |
|       | Reverse | CTTTACCAGCTCATTCTCACC      |
| Asc   | Forward | ATGCCATCCTGGACGCTCTT       |
|       | Reverse | ATGCGCCCATAGCCTTCTCG       |
| Hprt  | Forward | TTGCTCGAGATGTCATGAAGGA     |
|       | Reverse | AGCAGGTCAGCAAAGAAGCTTATAGC |

**Table S3.** List of antibodies used in Western blotting.

| <b>Antibody Name</b>  | <b>Catalog Number</b> | <b>Company</b>            | <b>Isotype</b> | <b>Dilution</b> |
|-----------------------|-----------------------|---------------------------|----------------|-----------------|
| P-JNK (Thr183/Tyr185) | 4668                  | Cell Signaling Technology | Rabbit         | 1:1000          |
| T-JNK (SAP/JNK)       | 9252                  | Cell Signaling Technology | Rabbit         | 1:1000          |
| p-c-Jun (Ser73)       | 3270                  | Cell Signaling Technology | Rabbit         | 1:1000          |
| c-Jun                 | 9165                  | Cell Signaling Technology | Rabbit         | 1:1000          |
| Anti-caspase-1 (p20)  | AG-20B-0042-C100      | Adipogen<br>Life Sciences | Mouse          | 1:500           |
